# Supplementary material for: Trajectories of dementia-related cognitive decline in a large mental health records derived patient cohort
Source: PLoS One. 2017 Jun 7;12(6):e0178562. doi: 10.1371/journal.pone.0178562 (PMC5462385; doi:10.1371/journal.pone.0178562)
Supplement: S1 Table — (XLSX) [file pone.0178562.s001.xlsx]

## Sheet: Sheet1
Medication class	Medication Name
Dementia	Donepezil
	Galantamine
	Memantine
	Rivastigmine
Anticholesterolmia	Atorvastatin
	Fluvastatin
	Pravastatin
	Rosuvastatin
	Simvastatin
Antihypertensives	Acebutolol
	Amlodipine
	Atenolol
	Bisoprolol
	Carvedilol
	Captopril
	Enalapril
	Eprosartan
	Hydrochlorothiazide
	Metoprolol
	Nadolol
	Nebivolol
	Olmesartan
	Propranolol
	Valsartan
	Verapamil
Antidepressants	Amitriptyline
	Nortriptyline
	Citalopram
	Escitalopram
	Fluoxetine
	Paroxetine
	Sertraline
Antipsychotics	Olanzapine
	Quetiapine
	Risperidone
AntiDiabetic	Pioglitazone
	Metformin
NSAIDs	Celecoxib
	DiclofenacPotassium
	Ibuprofen
	Indometacin
	MefenamicAcid
	Naproxen
Mood Stabiliser	Lithium
Epilepsy	Sodium Valproate
