# Supplementary material for: Trajectories of dementia-related cognitive decline in a large mental health records derived patient cohort
Source: PLoS One. 2017 Jun 7;12(6):e0178562. doi: 10.1371/journal.pone.0178562 (PMC5462385; doi:10.1371/journal.pone.0178562)
Supplement: S6 Table — AIC = Akaike Information Criterion, Df = degrees of freedome, full model = model includes all variables showing differences across trajectory classes; age, gender, ethnicity, age left formal education, baseline MMSE, HoNOS items; behavioural disturbances, non-accidental self-injury, cognitive problems, physical health or disability, hallucinations and/or delusions or false beliefs, depressive symptoms, other mental health or behaviour problems, social or supportive relationships, activities of daily living (ADL) and work and leisure activities, Medications; Donepezil, Memantine, Rivastigmine, Amlodipine, Citalopram, Fluoxetine, Sertraline, Olanzapine and Risperidone. (XLSX) [file pone.0178562.s006.xlsx]

## Sheet: Sheet1
	Step	Df	Deviance	Resid. Df	Resid. Dev	AIC
1		NA	NA	3191	7744.6	8244.6
2	- h_item9_bl	15	9.49774	3206	7754.1	8224.09
3	- h_item12_bl	15	9.05318	3221	7763.15	8203.15
4	- h_item5_bl	15	11.7301	3236	7774.88	8184.88
5	- h_item7_bl	15	22.3293	3251	7797.21	8177.21
6	- Risperidone	5	2.35549	3256	7799.56	8169.56
7	- Rivastigmine	5	3.20048	3261	7802.76	8162.76
8	- h_item6_bl	15	23.6386	3276	7826.4	8156.4
9	- Memantine	5	4.357	3281	7830.76	8150.76
10	- Citalopram	5	5.66254	3286	7836.42	8146.42
