# Supplementary material for: Trajectories of dementia-related cognitive decline in a large mental health records derived patient cohort
Source: PLoS One. 2017 Jun 7;12(6):e0178562. doi: 10.1371/journal.pone.0178562 (PMC5462385; doi:10.1371/journal.pone.0178562)
Supplement: S7 Table — RRR Relative Risk Ratio from multinomial regression analysis. CI Confidence Interval, *p ≤ 0.05, **p ≤ 0.01, ***p ≤ 0.001 (XLSX) [file pone.0178562.s007.xlsx]

## Sheet: Sheet1
	1 vs 4			2 vs 4			3 vs 4			5 vs 4			6 vs 4
	RRR	0.95	CI	RRR	0.95	CI	RRR	0.95	CI	RRR	0.95	CI	RRR	0.95	CI
Gender
Male	1.14	0.76	1.71	0.94	0.68	1.3	1.05	0.76	1.44	0.85	0.59	1.22	0.92	0.61	1.4
Age left school
15-16	0.51	0.2	1.34	0.38	0.17	0.86*	0.43	0.19	1	0.42	0.16	1.1	0.63	0.21	1.95
16-22	0.72	0.24	2.17	0.5	0.19	1.3	0.37	0.14	1.02	0.42	0.13	1.34	0.55	0.13	2.32
2014-07-01	0.39	0.16	0.94*	0.38	0.18	0.80*	0.47	0.22	1	0.44	0.19	1.02	0.99	0.38	2.62
Unknown	0.32	0.15	0.72**	0.31	0.15	0.61***	0.41	0.2	0.82*	0.44	0.21	0.94*	0.72	0.3	1.75
Ethnicity
Black	0.91	0.33	2.54	1.09	0.49	2.45	1.82	0.77	4.28	1.1	0.42	2.84	1.66	0.52	5.26
Others	1.04	0.22	5	0.55	0.16	1.85	0.76	0.21	2.68	1.62	0.44	5.98	1.91	0.39	9.37
White	1.07	0.44	2.61	0.88	0.43	1.81	1.35	0.62	2.93	0.82	0.35	1.96	1.19	0.41	3.47
Age	0.94	0.91	0.97***	0.99	0.97	1.02	1.03	1.01	1.06**	1.04	1.02	1.07**	1.03	1	1.06*
Baseline MMSE	2.62	2.36	2.91***	1.34	1.26	1.42***	0.92	0.87	0.96**	0.65	0.61	0.69***	0.48	0.45	0.52***
Cognitive Problems
Minor	1.19	0.67	2.12	1.15	0.68	1.92	1.79	1	3.21	2.27	0.92	5.6	7.69	1.79	33.01**
Mild	0.62	0.33	1.14	1.36	0.81	2.27	2.33	1.32	4.12**	4.83	2.06	11.33***	12.73	3.14	51.67***
Moderate or Severe	0.46	0.18	1.13	0.6	0.31	1.17	1.48	0.76	2.87	6.22	2.5	15.47***	25.41	6.06	106.55***
Donepezil	0.7	0.41	1.19	1.11	0.77	1.6	1.58	1.12	2.25*	1.23	0.83	1.82	1.03	0.66	1.6
Fluoxetine	6.26	1.62	24.16**	1.76	0.58	5.36	1.14	0.38	3.46	0.42	0.1	1.77	0.83	0.2	3.49
Sertraline	0.9	0.44	1.85	0.55	0.3	0.99*	0.49	0.27	0.90*	0.49	0.24	1.00*	0.29	0.12	0.69**
